# Supplementary material for: T-Cell Response and Antibody Production Induced by the COVID-19 Booster Vaccine in Japanese Chronic Kidney Disease Patients Treated with Hemodialysis
Source: MDPI journal article supplement (doi:10.3390/vaccines11030653), 2023-03-14
Supplement: s1 [file s1]

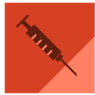

## Supplementary Materials

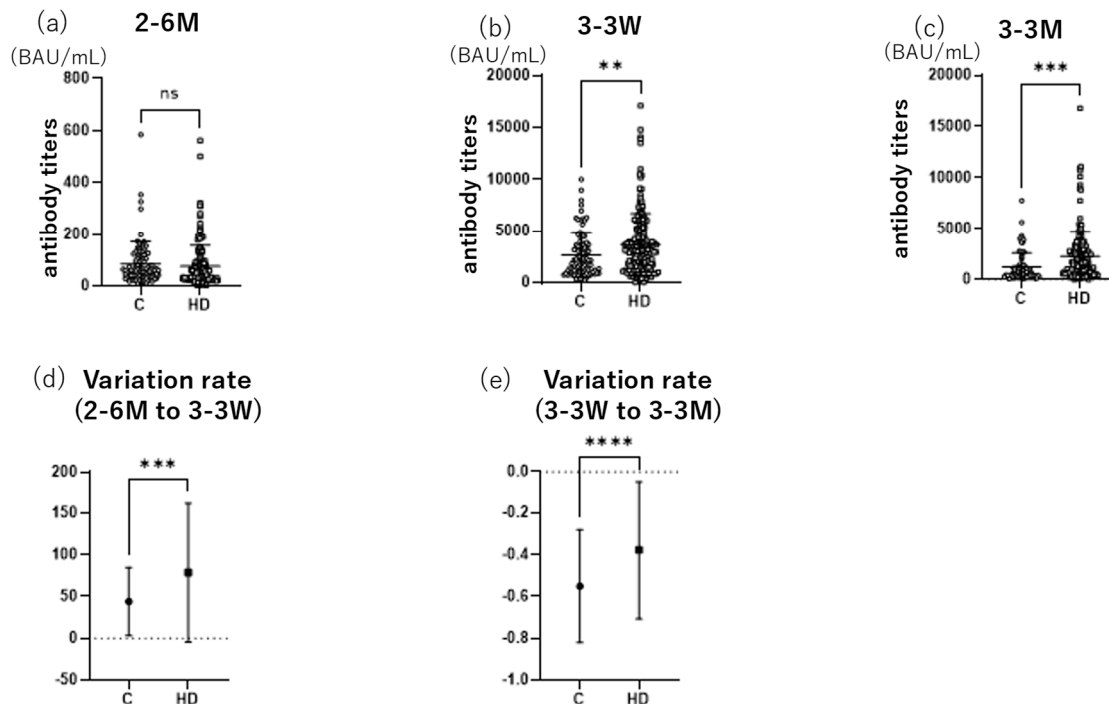

**Figure S1.** Comparison of antibody titers between the control and HD groups (only for participants who participated in all blood tests). At 6 months after the primary series, blood was obtained from 297 participants (control group,  $n=103$ ; HD group,  $n=194$ ); however, 29 participants withdrew from the study at 3 months after the booster dose. Blood was obtained from 258 participants (control group,  $n=82$ ; HD group,  $n=176$ ) at 3 months after the booster dose. (a) 6 months after the primary series. (b) 3 weeks after the booster dose. (c) 3 months after the booster dose. (d) Value at 3 weeks after the third vaccine - value at 6 months after the primary series/value at 6 months after the primary series. (e) Value at 3 months after the third vaccine - value at 3 weeks after the third vaccine/value at 3 weeks after the third vaccine. Bars indicate the median with a 95% confidence interval. \* $P \leq 0.05$ , \*\* $P \leq 0.01$ , \*\*\* $P \leq 0.001$ , \*\*\*\* $P \leq 0.0001$ . C: control; HD: hemodialysis. 2-6M: 6 months after the primary series; 3-3W: 3 weeks after the booster dose; 3-3M: 3 months after the booster dose.

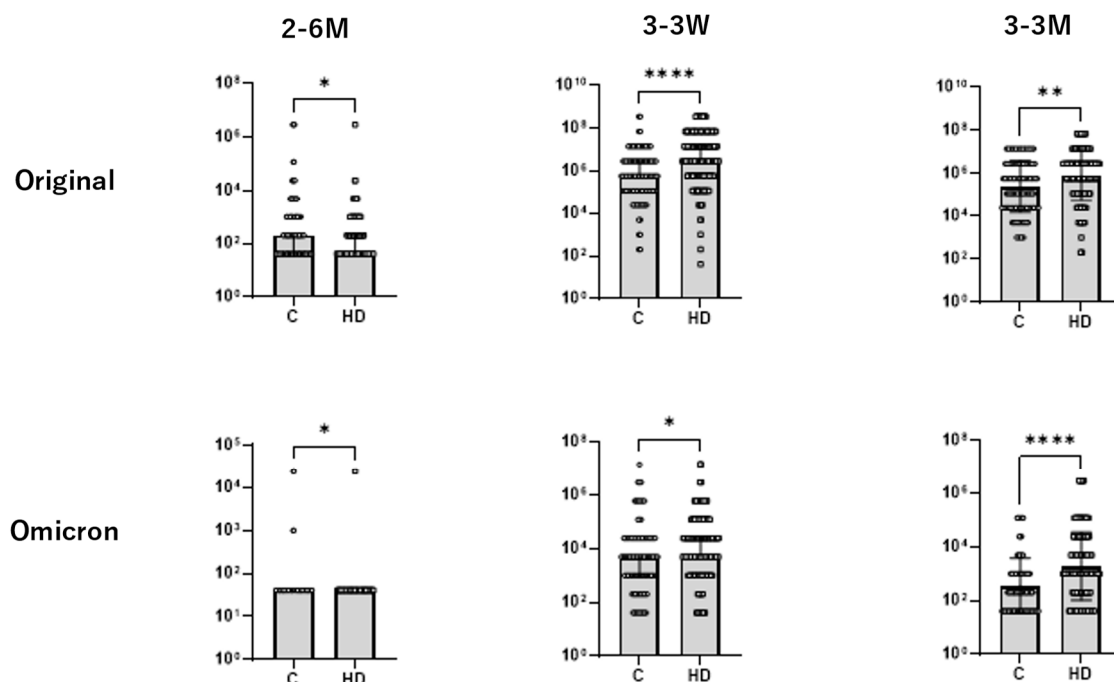

**Figure S2.** Comparison of neutralizing antibody titers between the control and HD groups. Neutralizing antibody titers in the control and HD groups were compared at three-time points: (a) 6 months after the primary series (control group,  $n=103$ ; HD group,  $n=194$ ); (b) 3 weeks after the booster dose (control group,  $n=97$ ; HD group,  $n=182$ ); and (c) 3 months after the booster dose (control group,  $n=82$ ; HD group,  $n=176$ ). Bars indicate the median with a 95% confidence interval \* $p\leq 0.05$ , \*\* $p\leq 0.01$ , \*\*\* $p\leq 0.001$ , \*\*\*\* $p\leq 0.0001$ . 2-6M: 6 months after the primary series; 3-3W: 3 weeks after the booster dose; 3-3M: 3 months after the booster dose; C: control; HD: Hemodialysis.

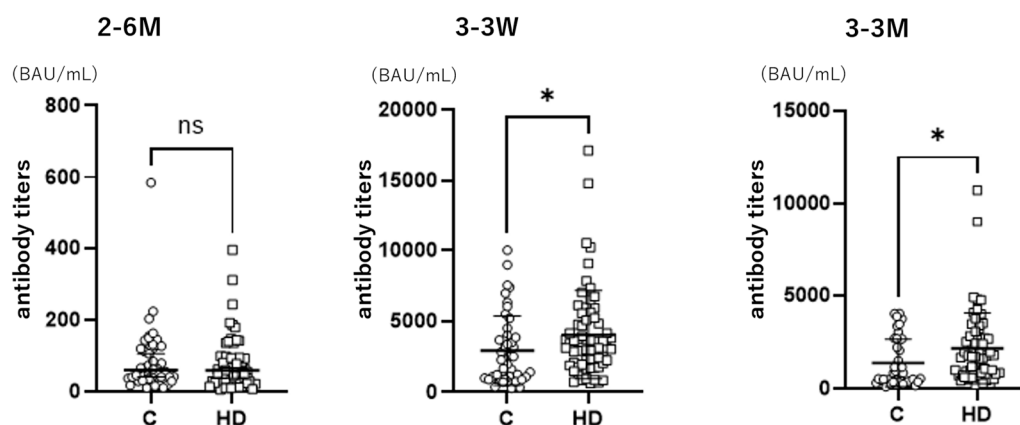

**Figure S3.** Comparison of antibody titers of the participants in the control and HD groups evaluated using the T-SPOT®.COVID test (T-SPOT). The severe acute respiratory syndrome coronavirus 2

(SARS-CoV-2) immunoglobulin (IgG) levels of the control and HD groups were compared. (a) 6 months after the primary series. (b) 3 weeks after the booster dose. (c) 3 months after the booster dose. Bars indicate the median with a 95% confidence interval \* $P \leq 0.05$ . C: control; HD: hemodialysis. 2-6M, 6 months after the primary series; 3-3W, 3 weeks after the booster dose; 3-3M, 3 months after the booster dose.

**Table S1.** Questionnaire about adverse reactions after the booster vaccination

| Questionnaire code                                                                        |                                          |
|-------------------------------------------------------------------------------------------|------------------------------------------|
| <b>Questionnaire on adverse reactions to booster vaccination.</b>                         |                                          |
| I received the booster dose of the vaccine on date ____ month ____ 2021.                  |                                          |
| Please answer the following questions about adverse reactions to the booster vaccination. |                                          |
| 1. Did you have any pain at the injection site?                                           | Yes (lasted for ____ days) / No          |
| 2. Did you experience redness at the injection site?                                      | Yes (lasted for ____ days) / No          |
| 3. Did you experience swelling at the injection site?                                     | Yes (lasted for ____ days) / No          |
| 4. Did the injection site become itchy?                                                   | Yes (lasted for ____ days) / No          |
| 5. Did you feel tired all over your body?                                                 | Yes (lasted for ____ days) / No          |
| 6. Do you have headache?                                                                  | Yes (lasted for ____ days) / No          |
| 7. Do you have muscle pain?                                                               | Yes (lasted for ____ days) / No          |
| 8. Do you feel chilly?                                                                    | Yes (lasted for ____ days) / No          |
| 9. Did you have fever?                                                                    | Yes (max. °C, lasted for ____ days) / No |
| 10. Did you have any joint pain?                                                          | Yes (lasted for ____ days) / No          |
| 11. Did you have nausea or vomiting?                                                      | Yes (lasted for ____ days) / No          |
| 12. Do you have diarrhea?                                                                 | Yes (lasted for ____ days) / No          |
| 13. Do you have stomachache?                                                              | Yes (lasted for ____ days) / No          |
| 14. Did you have allergic symptoms or anaphylaxis? Please select from the following.      |                                          |
| A: Allergic symptoms occurred (please specify: _____)                                     |                                          |
| B: Anaphylaxis occurred (please specify: _____)                                           |                                          |
| C: I was able to receive the inoculation without any particular problem.                  |                                          |
| Thank you very much for your cooperation.                                                 |                                          |

**Table S2.** Characteristics of participants in the T-SPOT study.

|                                    | Control group<br>(n=48) | HD group (n=64) | p value     |
|------------------------------------|-------------------------|-----------------|-------------|
| Male, n (%)                        | 31 (64.6)               | 35 (54.7)       | 0.2         |
| Age, years ( $\pm$ SD)             | 62.9 $\pm$ 7.9          | 69.4 $\pm$ 4.8  | <b>0.02</b> |
| BMI, kg/m <sup>2</sup> ( $\pm$ SD) | 24.1 $\pm$ 4.8          | 22.0 $\pm$ 4.6  | <b>0.02</b> |
| Diabetes mellitus, n (%)           | 9 (18.8)                | 21 (32.8)       | 0.07        |
| Hypertension, n (%)                | 25 (52.1)               | 22 (34.4)       | 0.05        |
| Malignant tumor, n (%)             | 6 (12.5)                | 13 (20.3)       | 0.2         |
| Cerebrovascular disease, n (%)     | 7 (14.6)                | 14 (21.9)       | 0.23        |
| Cardiovascular disease, n (%)      | 7 (14.6)                | 11 (17.2)       | 0.5         |
| COPD, n (%)                        | 3 (6.3)                 | 4 (6.3)         | 0.65        |
| Interval time* average $\pm$ SD    | 208.9 $\pm$ 15.1        | 215 $\pm$ 16.9  | <b>0.03</b> |

BMI: body mass index; COPD: chronic obstructive pulmonary disease; HD: hemodialysis; SD: standard deviation. \*Interval time: days from primary series to booster vaccination.
